# Supplementary material
Source: publisher figshare collection journal article supplement (https://gsapubs.figshare.com/articles/dataset/_/20431707)
Supplement: Supplementary file 1 [file 2]

Archive with 2 entries (2 files):
- B36465_SuppMat.pdf
- B36465_SuppData.xlsx
