# Supplementary material
Source: publisher figshare collection journal article supplement (https://gsapubs.figshare.com/articles/dataset/_/20431707)
Supplement: Supplementary file 1 [file 2 › B36465_SuppData.xlsx]

## Sheet: Sheet1
Beddings					Normal Faults
Latitude	Longitude	Strike	Dip		Latitude	Longitude	Fault n°	Strike	Dip	Striaes plunge	Raking from	Bedding offset (cm)
17.12949209	-61.88450351	295	10		17.0844444	-61.8986111		212	71
17.12080337	-61.87996894	345	30					180	33	85	N	10
17.12023367	-61.87865017	130	30					0	45	72	S	10
17.11977333	-61.88914944	300	12					50	25	75	W	10
17.11841	-61.89735	84	4					30	60
17.11843717	-61.89506026	300	12					235	30
17.12114231	-61.88107022	304	22		17.1022222	-61.7658333		355	65	82	N	10
17.12852807	-61.87950727	332	20					5	55	80	N
17.12593592	-61.87334989	210	20					10	60	65	N
17.08954115	-61.85627085	190	10					350	67	85	N
17.02311151	-61.79146805	324	28		17.0055556	-61.7727778		205	40
17.03013646	-61.75297958	320	20		17.10267118	-61.76470755		12	52	90
17.03192799	-61.75080781	320	20		17.10267118	-61.76470755		356	70	90
17.04924732	-61.76569531	360	20		17.07711725	-61.83248663		350	88	60	NW
17.05530642	-61.72822061	192	20		17.0671638	-61.73302852		180	80
17.14187155	-61.85937188	320	16		17.08044743	-61.85503936		186	82
17.1378478	-61.85895918	60	7		17.03840195	-61.82652551		48	72	45	E
17.15311474	-61.85435802	322	10		17.03840195	-61.82652551		48	72	34	E
17.16963781	-61.83417459	364	6		17.12949209	-61.88450351		180	62
17.11462116	-61.82691794	352	20		17.02071909	-61.79566832		36	76	36	S
17.11201763	-61.82463403	356	10		17.01860975	-61.79782546		50	86
17.11145374	-61.82360144	328	12		17.01420777	-61.8392778		8	76	26	N
17.10607327	-61.81872676	310	18		17.02276798	-61.7941756		56	86	52	S
17.07341772	-61.72063684	206	22		17.08044743	-61.85503936		48	80
17.06908201	-61.73452407	112	6		17.11779598	-61.85713963		48	60
17.04230197	-61.73955544	325	15		17.0376194	-61.89388636		210	86	74	W
17.04297	-61.74046	290	10		17.03513368	-61.68630058		40	80
17.10267118	-61.76470755	182	8		17.12699142	-61.79930022		188	90
17.09212346	-61.76298416	340	13		17.07711725	-61.83248663		197	68
17.10118052	-61.86049018	342	11		17.09895299	-61.78498068		194	90
17.13012679	-61.7969513	310	10		17.06173422	-61.87099415		6	78
17.12758975	-61.79909718	290	6		17.06173422	-61.87099415		30	80
17.12699142	-61.79930022	331	13		17.02612752	-61.8829085		182	84
17.14632172	-61.81649119	266	10		17.02612752	-61.8829085		218	90
17.14702596	-61.81595822	310	10		17.12758975	-61.79909718		238	90
17.14122495	-61.81890684	312	10		17.12758975	-61.79909718		218	90
17.10162912	-61.84416578	290	10		17.08542575	-61.85766121		184	42
17.10662699	-61.85606402	342	24		17.03311712	-61.89127668		234	90
17.10600556	-61.85681393	336	10		17.03311712	-61.89127668		208	86
17.09463317	-61.84493237	20	14		17.08044743	-61.85503936		218	90
17.08044743	-61.85503936	327	20		17.03865102	-61.85771635		222	90
17.04823779	-61.77921047	354	10		17.05904273	-61.87219566		30	88
17.03944535	-61.68547529	248	10		17.06057974	-61.88041898		42	78
17.15365336	-61.79351646	220	10		17.0376194	-61.89388636		50	82
17.15201057	-61.78787406	282	7		17.1308333	-61.8636111	fault 1	98	63
17.04188989	-61.75010335	330	10					113	72
17.09895299	-61.78498068	320	14					285	49
17.02244787	-61.73897212	310	17		17.1319444	-61.8638889	major fault	267	82	85	W	10
17.01942197	-61.7371952	307	30					267	82	81	W
17.11779598	-61.85713963	344	12					267	82	89	W
17.07765374	-61.80194955	330	18					95	90	86	W	50
17.039565	-61.78695903	310	8					95	90	89	W	50
17.03620624	-61.78527316	297	24					95	90	85	W	50
17.01428706	-61.78672023	54	16					67	90	78	W	10
17.02988776	-61.77221123	220	22					66	70	74	E	10
17.03137093	-61.77429695	204	34					226	70	77	W	10
17.02943428	-61.77190589	310	38		17.1405556	-61.8591667	fault 1	336	54	78	W	10
17.04843667	-61.7705239	315	11					340	70	70	W	10
17.04643004	-61.79874584	315	16					340	75	77	W	10
17.06943166	-61.81585454	160	4				fault 2	336	64	78	W	50
17.06755448	-61.81619206	350	16				fault 3	332	78	86	W	50
17.06278636	-61.80866594	294	8					323	70	87	W	50
17.05547134	-61.80156437	356	10					332	64	83	W	100
17.04530059	-61.79961617	330	18					320	64	87	W	300
17.05163573	-61.81518621	356	15					321	60	82	W	300
17.02494068	-61.74258875	296	20					330	58	88	E	300
17.13077417	-61.86243389	300	10				fault 4	320	50			300
17.15022866	-61.84012567	320	18					78	75			300
17.15600997	-61.84233995	318	16					72	84			300
17.09715674	-61.82317892	353	10				major fault	105	55			50
17.0877237	-61.70213918	146	8					110	78			50
17.08774111	-61.70486233	164	11		17.09463317	-61.84493237		100	64			50
17.04636388	-61.72930837	218	20		17.0919444	-61.7633333	major fault	270	82	82	E	2000
17.06999132	-61.75992525	320	18					265	83	90	E	2000
17.08171632	-61.87604102	152	30					269	88	88	E
17.08542575	-61.85766121	256	48					270	86	75	E
17.08159524	-61.80389305	350	10					265	86	83	E
17.10428311	-61.80042409	365	13					265	87	79	E	3000
17.1393431	-61.81529858	328	10				fault 2	90	55	77	E
17.09655937	-61.81046327	52	20					96	57	84	E
17.1624565	-61.82676345	294	10					90	65	89	E
17.04763817	-61.77257059	317	30					270	50
17.0462413	-61.77347054	300	30		17.16987017	-61.83481167		258	18
17.08354507	-61.80700629	340	10		17.10267118	-61.76470755		282	52
17.10061518	-61.67858144	152	4		17.09212346	-61.76298416		272	84
17.03526699	-61.68855766	360	6		17.02554417	-61.86861604		285	55	65	W
17.03526699	-61.68855766	122	12		17.00696502	-61.76785972		290	68
17.03513368	-61.68630058	300	2		17.0376194	-61.89388636		84	74	75	W
17.00788918	-61.75778756	320	20		17.10118052	-61.86049018		77	83
17.00275637	-61.77030263	232	14		17.10162912	-61.84416578		274	58
17.00293367	-61.77189907	360	18		17.05010925	-61.89305289		278	90	84	W
17.03245813	-61.74087063	354	12		17.01942197	-61.7371952		95	65
17.03664174	-61.74243489	340	28		17.05955495	-61.87945193		276	11
17.03702166	-61.74197148	302	26		17.12593592	-61.87334989		100	60
17.02282139	-61.7397925	320	32		17.13012679	-61.7969513		94	88
17.0077778	-61.7861111	185	17		17.09463317	-61.84493237		86	78
17.0075	-61.7852778	210	25		17.09895299	-61.78498068		284	78
17.0136111	-61.7861111	280	36		17.03513368	-61.68630058		90	90
17.0083333	-61.7822222	233	10		17.03311712	-61.89127668		282	48
17.0227778	-61.7413889	311	38		17.12758975	-61.79909718		286	90
17.0318833	-61.75105	336	19		17.12758975	-61.79909718		276	90
17.0301833	-61.7529667	306	21		17.12699142	-61.79930022		250	88
17.0316	61.75385	272	9		17.10162912	-61.84416578		108	84
17.0317667	-61.7560667	312	21		17.08542575	-61.85766121		270	40
17.0321	-61.7573833	333	14		17.08542575	-61.85766121		290	44
17.0327833	-61.7576	310	21		17.06173422	-61.87099415		262	38
17.0331	-61.7580833	292	20		17.09655937	-61.81046327		270	78
17.0321	-61.7573833	325	25		17.09655937	-61.81046327		284	86
17.0321	-61.7573833	300	33		17.0072222	-61.7675	fault 1	355	87	25	S
17.0308	-61.7563667	320	14		17.0072222	-61.7675		355	87	40	S
17.0308	-61.7563667	305	11		17.0072222	-61.7675		355	87	75	S
17.125	-61.8875	300	3		17.0072222	-61.7675		355	87	150	S
17.1208333	-61.88	304	17		17.0072222	-61.7675		355	87	30	S
17.1208333	-61.88	304	17		17.0072222	-61.7675		354	87	30	S
17.1308333	-61.8636111	290	7		17.0072222	-61.7675		354	87	20	S
17.1405556	-61.8591667	195	19		17.0072222	-61.7675		354	87	70	S
17.0780556	-61.8833333	263	8		17.0072222	-61.7675		354	87	45	S
17.0877778	-61.8558333	338	20		17.0072222	-61.7675	fault 2	295	60	85	E
17.035	-61.8347222	260	30		17.0072222	-61.7675		286	66	80	E
17.0052778	-61.7647222	336	14		17.0072222	-61.7675		290	70	70	E
17.0266667	-61.1374917	300	16		17.0072222	-61.7675		303	75	75	E
17.1175	-61.8572222	330	7		17.0072222	-61.7675		282	61	90	E
17.0836111	-61.8069444	317	22		17.0072222	-61.7675		285	60	80	E
17.0147222	-61.7638889	280	15		17.0072222	-61.7675		315	70	70	E
17.1308333	-61.8636111	267	20		17.0072222	-61.7675	fault 3	125	84	75	E
17.125	-61.7944444	250	24		17.0072222	-61.7675		105	75	60	E
17.0027778	-61.7702778	305	17		17.0072222	-61.7675		105	75	70	E
17.0919444	-61.7633333	316	18		17.0072222	-61.7675		110	86	80	E
17.0919444	-61.7633333	316	18		17.0072222	-61.7675		114	79	85	E
17.0919444	-61.7633333	346	5		17.0072222	-61.7675		105	75	65	E
17.0986111	-61.6791667	sub horizontal			17.0072222	-61.7675		95	87	40	E
17.0680556	-61.7486111	sub horizontal			17.0072222	-61.7675	fault 4	300	61	70	W
17.1286111	-61.7997222	315	5		17.0072222	-61.7675		300	61	74	W
					17.0072222	-61.7675		300	61	64	W
Fractures					17.0072222	-61.7675		300	61	60	W
Latitude	Longitude	Strike	Dip		17.0072222	-61.7675		302	66	68	W
17.03513368	-61.68630058	90	90		17.0072222	-61.7675		302	66	45	W
17.11843717	-61.89506026	355	52		17.0125667	-61.7613	fault 1	138	65	66	W
17.12593592	-61.87334989	280	60		17.0125667	-61.7613		131	59	65	W
17.0812513	-61.90285521	115	90		17.0125667	-61.7613		140	60	70	W
17.01225638	-61.78988174	140	90		17.0125667	-61.7613		130	61	70	W
17.03578701	-61.8306201	320	80		17.1208333	-61.88	fault1	322	75	50	S
17.11145374	-61.82360144	60	74		17.10162912	-61.84416578		130	60
17.10118052	-61.86049018	317	77		17.0877778	-61.8558333		170	80	70	W
17.03311712	-61.89127668	102	48		17.0877778	-61.8558333		144	44	90	W	30
17.03311712	-61.89127668	118	72		17.0877778	-61.8558333	major fault	174	56	72	W
17.03311712	-61.89127668	54	90		17.0877778	-61.8558333		160	42	83	W
17.03311712	-61.89127668	28	86		17.0877778	-61.8558333		160	75	78	W
17.13012679	-61.7969513	274	88		17.0877778	-61.8558333		125	40			500
17.12758975	-61.79909718	202	88		17.0266667	-61.1374917		150	70
17.12758975	-61.79909718	58	90		17.0452778	-61.8941667		110	53	82	E
17.12758975	-61.79909718	106	90		17.0252778	-61.8686111		310	80	40	W
17.12758975	-61.79909718	96	90		17.0252778	-61.8686111		310	76	45	W
17.12758975	-61.79909718	38	90		17.0252778	-61.8686111		302	82	50	W
17.12699142	-61.79930022	8	90		17.0252778	-61.8686111		298	75	50	W
17.12699142	-61.79930022	70	88		17.0252778	-61.8686111		299	81	35	W
17.12699142	-61.79930022	60	50		17.0252778	-61.8686111		300	81	80	W
17.10162912	-61.84416578	288	84		17.0252778	-61.8686111		310	87	76	E
17.10162912	-61.84416578	320	86		17.0252778	-61.8686111		298	75	80	E
17.10662699	-61.85606402	232	75		17.0252778	-61.8686111		299	81	70	W
17.09463317	-61.84493237	266	78		17.0252778	-61.8686111	MEAN	303	80
17.08044743	-61.85503936	38	90		17.0075	-61.7852778		152	90
17.05010925	-61.89305289	212	75		17.0075	-61.7852778		330	50	80	E
17.07199716	-61.89392773	340	44		17.0075	-61.7852778		240	56	78	E
17.07199716	-61.89392773	130	50		17.0075	-61.7852778		285	80
17.07711725	-61.83248663	17	68		17.0075	-61.7852778		290	73
17.07711725	-61.83248663	328	75		17.0075	-61.7852778		126	85
17.07711725	-61.83248663	349	89		17.0075	-61.7852778	MEAN	309	76
17.09895299	-61.78498068	14	90		17.08099637	-61.90176893		314	80	80	N
17.09895299	-61.78498068	104	78		17.05010925	-61.89305289		132	75	83	W
17.09895299	-61.78498068	210	90		17.01237914	-61.76102131		140	60
17.00539735	-61.76499201	190	80		17.00743862	-61.76494723		120	88
17.00464866	-61.76372373	190	80		17.01942197	-61.7371952		150	50
17.00464866	-61.76372373	150	90		17.08542575	-61.85766121		158	52
17.03664174	-61.74243489	160	28		17.02282139	-61.7397925		150	55
17.03664174	-61.74243489	222	68		17.02554417	-61.86861604		300	80	52	W
17.03702166	-61.74197148	206	70		17.02554417	-61.86861604		310	80	64	W
17.03702166	-61.74197148	212	64		17.00696502	-61.76785972		330	90
17.08171632	-61.87604102	150	90		17.00696502	-61.76785972		306	54
17.08542575	-61.85766121	326	40		17.12852807	-61.87950727		340	30
17.08542575	-61.85766121	196	34		17.03664174	-61.74243489		312	28
17.08542575	-61.85766121	4	42		17.03840195	-61.82652551		132	50	34	SE
17.08542575	-61.85766121	90	40		17.08099637	-61.90176893		300	78	80	N
17.08542575	-61.85766121	110	44		17.00696502	-61.76785972		338	88
17.03865102	-61.85771635	165	80		17.0093663	-61.75726726		325	85
17.03865102	-61.85771635	42	90		17.03578701	-61.8306201		300	68	28	SW
17.03865102	-61.85771635	298	80		17.07299258	-61.89376649		328	38
17.03865102	-61.85771635	66	86		17.05904273	-61.87219566		120	50
17.03877639	-61.85875132	334	88		17.03311712	-61.89127668		298	72
17.02612752	-61.8829085	38	90		17.08542575	-61.85766121		146	40
17.02612752	-61.8829085	118	84		17.03877639	-61.85875132		154	88
17.02612752	-61.8829085	2	84		17.05904273	-61.87219566		132	50
17.06173422	-61.87099415	186	78		17.0376194	-61.89388636		150	72
17.06173422	-61.87099415	56	78		17.01225638	-61.78988174		140	90
17.06173422	-61.87099415	82	38		17.03578701	-61.8306201		140	80
17.06173422	-61.87099415	210	80		17.10118052	-61.86049018		137	77
17.05904273	-61.87219566	312	50		17.10162912	-61.84416578		140	86
17.05904273	-61.87219566	210	88		17.07199716	-61.89392773		160	44
17.09655937	-61.81046327	90	78		17.07199716	-61.89392773		310	50
17.09655937	-61.81046327	104	86		17.00464866	-61.76372373		330	90
17.09655937	-61.81046327	127	84		17.08171632	-61.87604102		330	90
17.06057974	-61.88041898	222	78		17.09655937	-61.81046327		307	84
17.0376194	-61.89388636	330	72		17.02612752	-61.8829085		298	84
17.0376194	-61.89388636	352	78		17.07711725	-61.83248663		148	75
17.0376194	-61.89388636	230	82		17.03664174	-61.74243489		340	28
